# Supplementary material for: Quantitative Proteomics Analysis of Herbaceous Peony in Response to Paclobutrazol Inhibition of Lateral Branching
Source: MDPI journal article supplement (doi:10.3390/ijms161024332), 2015-10-14
Supplement: s1 [file s1]

# Supplementary Information

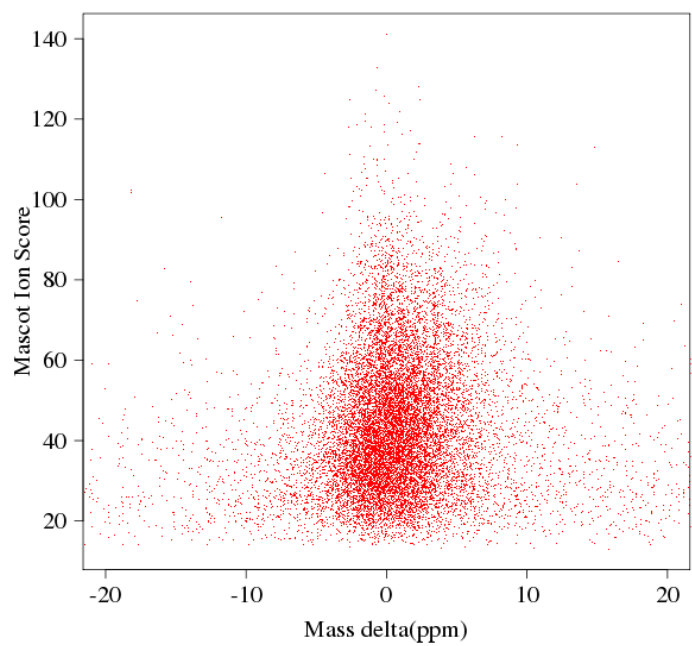

**Figure S1.** The error distribution of the peptide spectra match quality in *P. lactiflora* lateral branches.

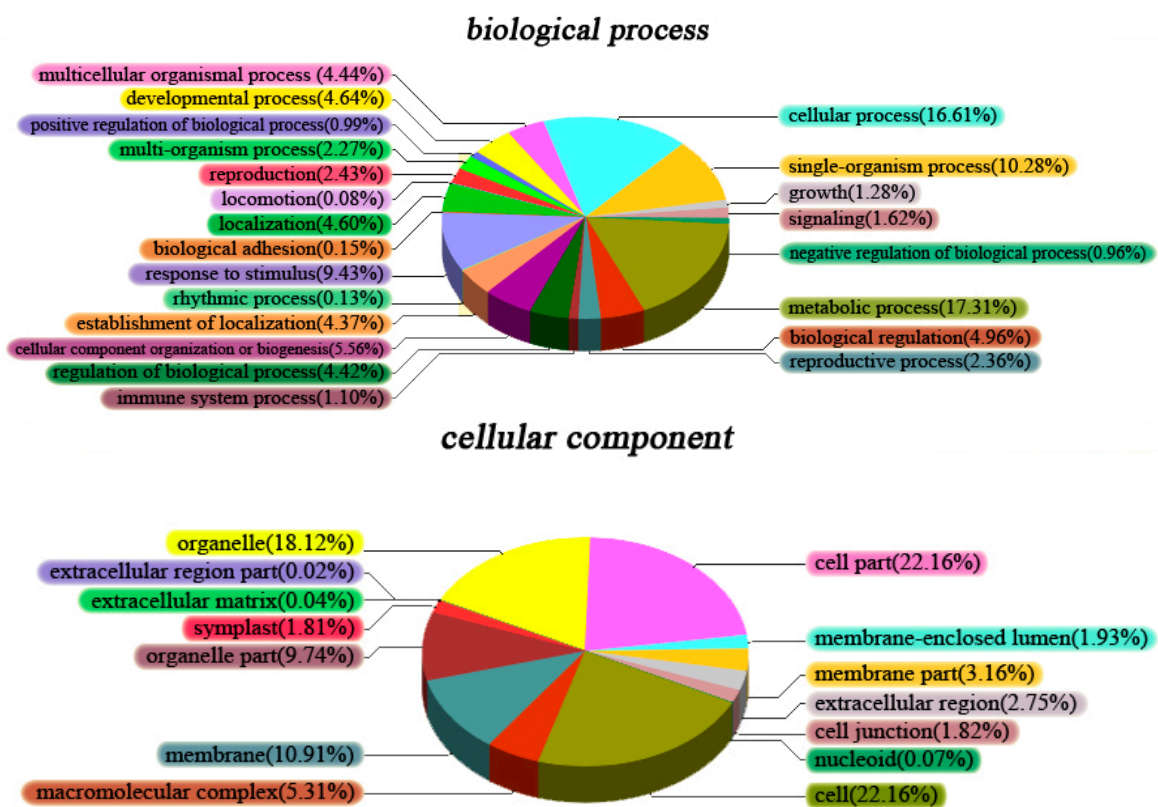

**Figure S2.** *Cont.*

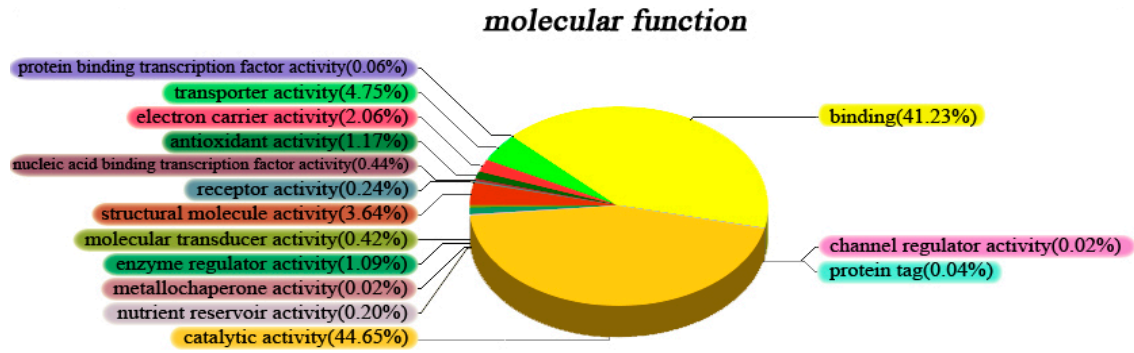

**Figure S2.** The GO analysis of total identified proteins in *P. lactiflora* lateral branches. GO: gene ontology.

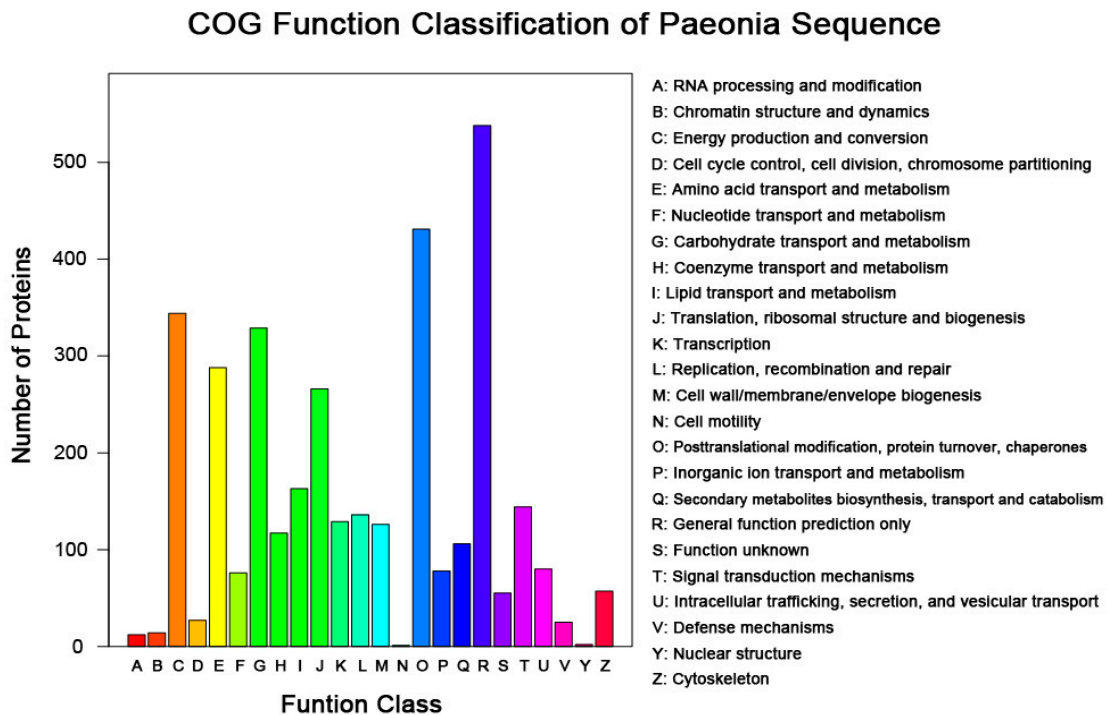

**Figure S3.** The COG analysis of total identified proteins in *P. lactiflora* lateral branches. COG: cluster of orthologous groups of proteins.

**Table S6.** 74 KEGG pathways with pathway ID information.

| No. | Pathway                                     | DEPs with Pathway Annotation (165) | Pathway ID |
|-----|---------------------------------------------|------------------------------------|------------|
| 1   | Metabolic pathways                          | 90 (54.55%)                        | ko01100    |
| 2   | Biosynthesis of secondary metabolites       | 55 (33.33%)                        | ko01110    |
| 3   | Phenylpropanoid biosynthesis                | 14 (8.48%)                         | ko00940    |
| 4   | Glyoxylate and dicarboxylate metabolism     | 12 (7.27%)                         | ko00630    |
| 5   | Carbon fixation in photosynthetic organisms | 13 (7.88%)                         | ko00710    |
| 6   | Ribosome                                    | 14 (8.48%)                         | ko03010    |
| 7   | Cysteine and methionine metabolism          | 7 (4.24%)                          | ko00270    |
| 8   | Tryptophan metabolism                       | 3 (1.82%)                          | ko00380    |
| 9   | One carbon pool by folate                   | 4 (2.42%)                          | ko00670    |

Table S6. *Cont.*

| No. | Pathway                                               | DEPs with Pathway Annotation (165) | Pathway ID |
|-----|-------------------------------------------------------|------------------------------------|------------|
| 10  | Flavonoid biosynthesis                                | 5 (3.03%)                          | ko00941    |
| 11  | Alanine, aspartate and glutamate metabolism           | 7 (4.24%)                          | ko00250    |
| 12  | Photosynthesis—antenna proteins                       | 3 (1.82%)                          | ko00196    |
| 13  | Propanoate metabolism                                 | 5 (3.03%)                          | ko00640    |
| 14  | Isoflavonoid biosynthesis                             | 2 (1.21%)                          | ko00943    |
| 15  | Pentose and glucuronate interconversions              | 5 (3.03%)                          | ko00040    |
| 16  | Vitamin B6 metabolism                                 | 3 (1.82%)                          | ko00750    |
| 17  | Glycolysis/Gluconeogenesis                            | 10 (6.06%)                         | ko00010    |
| 18  | Histidine metabolism                                  | 2 (1.21%)                          | ko00340    |
| 19  | Arginine and proline metabolism                       | 6 (3.64%)                          | ko00330    |
| 20  | Phenylalanine metabolism                              | 6 (3.64%)                          | ko00360    |
| 21  | Nitrogen metabolism                                   | 4 (2.42%)                          | ko00910    |
| 22  | Linoleic acid metabolism                              | 2 (1.21%)                          | ko00591    |
| 23  | Purine metabolism                                     | 7 (4.24%)                          | ko00230    |
| 24  | Glycine, serine and threonine metabolism              | 6 (3.64%)                          | ko00260    |
| 25  | Peroxisome                                            | 5 (3.03%)                          | ko04146    |
| 26  | Amino sugar and nucleotide sugar metabolism           | 7 (4.24%)                          | ko00520    |
| 27  | Ascorbate and aldarate metabolism                     | 5 (3.03%)                          | ko00053    |
| 28  | Cyanoamino acid metabolism                            | 3 (1.82%)                          | ko00460    |
| 29  | Lysine degradation                                    | 2 (1.21%)                          | ko00310    |
| 30  | Galactose metabolism                                  | 4 (2.42%)                          | ko00052    |
| 31  | Selenocompound metabolism                             | 2 (1.21%)                          | ko00450    |
| 32  | Stilbenoid, diarylheptanoid and gingerol biosynthesis | 2 (1.21%)                          | ko00945    |
| 33  | Glycerolipid metabolism                               | 2 (1.21%)                          | ko00561    |
| 34  | Phenylalanine, tyrosine and tryptophan biosynthesis   | 3 (1.82%)                          | ko00400    |
| 35  | Flavone and flavonol biosynthesis                     | 1 (0.61%)                          | ko00944    |
| 36  | Pyruvate metabolism                                   | 5 (3.03%)                          | ko00620    |
| 37  | Terpenoid backbone biosynthesis                       | 2 (1.21%)                          | ko00900    |
| 38  | Riboflavin metabolism                                 | 1 (0.61%)                          | ko00740    |
| 39  | Tyrosine metabolism                                   | 3 (1.82%)                          | ko00350    |
| 40  | beta-Alanine metabolism                               | 2 (1.21%)                          | ko00410    |
| 41  | Glycosphingolipid biosynthesis—ganglio series         | 1 (0.61%)                          | ko00604    |
| 42  | Glycosaminoglycan degradation                         | 1 (0.61%)                          | ko00531    |
| 43  | Proteasome                                            | 3 (1.82%)                          | ko03050    |
| 44  | Fatty acid metabolism                                 | 3 (1.82%)                          | ko00071    |
| 45  | Ether lipid metabolism                                | 1 (0.61%)                          | ko00565    |
| 46  | Valine, leucine and isoleucine degradation            | 2 (1.21%)                          | ko00280    |
| 47  | Sphingolipid metabolism                               | 1 (0.61%)                          | ko00600    |
| 48  | Limonene and pinene degradation                       | 1 (0.61%)                          | ko00903    |
| 49  | Lysine biosynthesis                                   | 1 (0.61%)                          | ko00300    |
| 50  | Plant hormone signal transduction                     | 3 (1.82%)                          | ko04075    |
| 51  | RNA degradation                                       | 3 (1.82%)                          | ko03018    |
| 52  | Photosynthesis                                        | 4 (2.42%)                          | ko00195    |
| 53  | Isoquinoline alkaloid biosynthesis                    | 1 (0.61%)                          | ko00950    |
| 54  | Porphyrin and chlorophyll metabolism                  | 1 (0.61%)                          | ko00860    |

**Table S6. Cont.**

| <b>No.</b> | <b>Pathway</b>                                         | <b>DEPs with Pathway Annotation (165)</b> | <b>Pathway ID</b> |
|------------|--------------------------------------------------------|-------------------------------------------|-------------------|
| 55         | alpha-Linolenic acid metabolism                        | 2 (1.21%)                                 | ko00592           |
| 56         | Starch and sucrose metabolism                          | 5 (3.03%)                                 | ko00500           |
| 57         | Phagosome                                              | 3 (1.82%)                                 | ko04145           |
| 58         | Butanoate metabolism                                   | 1 (0.61%)                                 | ko00650           |
| 59         | Tropane, piperidine and pyridine alkaloid biosynthesis | 1 (0.61%)                                 | ko00960           |
| 60         | mRNA surveillance pathway                              | 2 (1.21%)                                 | ko03015           |
| 61         | Glycerophospholipid metabolism                         | 1 (0.61%)                                 | ko00564           |
| 62         | Citrate cycle (TCA cycle)                              | 2 (1.21%)                                 | ko00020           |
| 63         | Aminoacyl-tRNA biosynthesis                            | 2 (1.21%)                                 | ko00970           |
| 64         | Other glycan degradation                               | 1 (0.61%)                                 | ko00511           |
| 65         | Ribosome biogenesis in eukaryotes                      | 1 (0.61%)                                 | ko03008           |
| 66         | Glutathione metabolism                                 | 2 (1.21%)                                 | ko00480           |
| 67         | Fructose and mannose metabolism                        | 2 (1.21%)                                 | ko00051           |
| 68         | Ubiquitin mediated proteolysis                         | 1 (0.61%)                                 | ko04120           |
| 69         | Pyrimidine metabolism                                  | 1 (0.61%)                                 | ko00240           |
| 70         | Plant-pathogen interaction                             | 2 (1.21%)                                 | ko04626           |
| 71         | Endocytosis                                            | 1 (0.61%)                                 | ko04144           |
| 72         | Protein processing in endoplasmic reticulum            | 2 (1.21%)                                 | ko04141           |
| 73         | RNA transport                                          | 1 (0.61%)                                 | ko03013           |
| 74         | Oxidative phosphorylation                              | 1 (0.61%)                                 | ko00190           |

**Table S7.** Candidate DEPs involved in the growth inhibition of *P. lactiflora* lateral branches under PBZ application.

| Accession                                    | Species                        | Description                                     | Abbreviation | Coverage (%) | Mass (Da) | Ratio (PBZ/Control) |
|----------------------------------------------|--------------------------------|-------------------------------------------------|--------------|--------------|-----------|---------------------|
| <b>Defense and stress response</b>           |                                |                                                 |              |              |           |                     |
| gi 223547351                                 | <i>Ricinus communis</i>        | lipoxygenase                                    | LOX          | 1.2          | 121,118   | 1.641               |
| gi 557104863                                 | <i>Arabidopsis thaliana</i>    | peroxiredoxin-2E                                | PRX2E        | 12.3         | 29,350    | 1.622               |
| gi 67008247                                  | <i>Andrographis paniculata</i> | catalase                                        | CAT          | 22.8         | 36,540    | 1.256               |
| gi 223540303                                 | <i>Ricinus communis</i>        | heat-shock protein                              | HSP          | 9.3          | 22,372    | 1.593               |
| <b>Hormone related proteins</b>              |                                |                                                 |              |              |           |                     |
| gi 375314636                                 | <i>Paeonia lactiflora</i>      | 1-aminocyclopropane-1-carboxylate oxidase       | ACO          | 11.9         | 44,259    | 1.321               |
| gi 158564566                                 | <i>Paeonia suffruticosa</i>    | auxin-repressed protein                         | ARP          | 19.8         | 16,150    | 1.262               |
| gi 350538405                                 | <i>Solanum lycopersicum</i>    | isopentenyl diphosphate isomerase               | IPI          | 14.5         | 32,568    | 0.392               |
| gi 75250205                                  | <i>Hevea brasiliensis</i>      | geranylgeranyl pyrophosphate synthase           | GGPS         | 3.8          | 48,208    | 0.666               |
| <b>Carbohydrate transport and metabolism</b> |                                |                                                 |              |              |           |                     |
| gi 17017255                                  | <i>Nicotiana tabacum</i>       | aquaporin                                       | AQP          | 8.4          | 34,867    | 1.499               |
| gi 150416573                                 | <i>Gossypium hirsutum</i>      | aquaporin PIP1-2                                | PIP1-2       | 8.4          | 35,692    | 1.638               |
| <b>Lipid transport and metabolism</b>        |                                |                                                 |              |              |           |                     |
| gi 1698844                                   | <i>Ricinus communis</i>        | phospholipase D                                 | PLD          | 12.5         | 105,167   | 1.339               |
| <b>Protein transport and metabolism</b>      |                                |                                                 |              |              |           |                     |
| gi 343172102                                 | <i>Silene latifolia</i>        | 20S proteasome subunit alpha type 7             | PSA7         | 16.5         | 33,107    | 1.217               |
| gi 222842473                                 | <i>Populus trichocarpa</i>     | ATP-dependent 26S proteasome regulatory subunit | PRS          | 27.9         | 53,879    | 1.269               |
| <b>Energy metabolism</b>                     |                                |                                                 |              |              |           |                     |
| gi 225432854                                 | <i>Vitis vinifera</i>          | pyruvate kinase isozyme A                       | PKIA         | 11.1         | 72,564    | 0.769               |
| gi 356525744                                 | <i>Glycine max</i>             | phosphoglycerate kinase                         | PGK          | 18           | 53,925    | 0.721               |
| gi 355485086                                 | <i>Medicago truncatula</i>     | glyceraldehyde-3-phosphate dehydrogenase        | GAPDH        | 11.7         | 53,435    | 0.414               |
| <b>Cell structure related proteins</b>       |                                |                                                 |              |              |           |                     |
| gi 82394883                                  | <i>Gerbera jamesonii</i>       | xyloglucan endotransglucosylase                 | XT           | 8.4          | 39,213    | 0.711               |
| gi 3287956                                   | <i>Glycine max</i>             | actin-3                                         | ACTIN3       | 31.9         | 48,198    | 0.517               |
| gi 527182282                                 | <i>Genlisea aurea</i>          | actin                                           | ACTIN        | 33.3         | 36,707    | 0.504               |
| gi 359475114                                 | <i>Vitis vinifera</i>          | isoflavone reductase                            | IFR          | 5.2          | 33,592    | 0.687               |
| gi 223540897                                 | <i>Ricinus communis</i>        | isoflavone reductase                            | IFR          | 3.8          | 42,856    | 0.503               |

Table S7. Cont.

| Accession                   | Species                      | Description                                                           | Abbreviation | Coverage (%) | Mass (Da) | Ratio (PBZ/Control) |
|-----------------------------|------------------------------|-----------------------------------------------------------------------|--------------|--------------|-----------|---------------------|
| <b>Cell wall metabolism</b> |                              |                                                                       |              |              |           |                     |
| gi 470133240                | <i>Fragaria vesca</i>        | bifunctional 3-dehydroquinate dehydratase/<br>shikimate dehydrogenase | DHD/SHD      | 4.1          | 68,103    | 0.78                |
| gi 67867090                 | <i>Ulmus americana</i>       | phenylalanine ammonia-lyase                                           | PAL          | 2.9          | 67,303    | 0.358               |
| gi 385718959                | <i>Paeonia lactiflora</i>    | phenylalanine ammonia-lyase                                           | PAL          | 22.7         | 89,039    | 0.341               |
| gi 285028552                | <i>Fagopyrum esculentum</i>  | phenylalanine ammonia-lyase                                           | PAL          | 11.2         | 90,728    | 0.321               |
| gi 363541683                | <i>Medicago sativa</i>       | phenylalanine ammonia-lyase                                           | PAL          | 8.7          | 63,676    | 0.308               |
| gi 459353590                | <i>Paeonia lactiflora</i>    | cinnamate 4-hydroxylase                                               | C4H          | 33.9         | 68,846    | 0.448               |
| gi 31414896                 | <i>Fragaria x ananassa</i>   | cinnamoyl CoA reductase                                               | CCR          | 5.6          | 46,058    | 0.504               |
| gi 227286085                | <i>Codonopsis lanceolata</i> | cinnamoyl CoA reductase                                               | CCR          | 8.3          | 45,020    | 0.425               |
| gi 347730541                | <i>Quercus suber</i>         | cinnamyl alcohol dehydrogenase 2                                      | CAD2         | 8.2          | 31,545    | 0.462               |
| gi 62734979                 | <i>Linum usitatissimum</i>   | cinnamyl alcohol dehydrogenase                                        | CAD          | 5.5          | 35,894    | 0.405               |
| gi 470121238                | <i>Fragaria vesca</i>        | pectinesterase/pectinesterase inhibitor 35-like                       | PE/PEI35L    | 2.4          | 71,889    | 0.448               |
| gi 541135565                | <i>Betula luminifera</i>     | sucrose synthase 2                                                    | SUS2         | 9.2          | 106,948   | 0.378               |
| gi 213868495                | <i>Ipomoea batatas</i>       | UDP-glucose pyrophosphorylase                                         | UGPase       | 8.5          | 64,370    | 0.48                |

**Table S8.** Gene-specific primers sequence for detection by Q-PCR.

| <b>Gene</b>  | <b>Forward Primer (5'–3')</b> | <b>Reverse Primer (5'–3')</b> |
|--------------|-------------------------------|-------------------------------|
| <i>Actin</i> | GCAGTGTTCCCCAGTATT            | TCTTTTCCATGTCATCCC            |
| <i>ACO</i>   | GCCTCATCTTACTCTTCCAA          | GCAAGCGACATCCTATTACC          |
| <i>PAL</i>   | TGCCTCGCTACTTACCCT            | GCTCCTCCTCAAATGCTG            |
| <i>C4H</i>   | GCACGACAGGAGTAACAA            | CACTCAATGGACCACAGC            |
| <i>ARP</i>   | GAGGTCGCTTTCTATGCC            | AGATTGCTGCCAGGGTTG            |
